# Supplementary material
Source: PubMed Central journal article supplement (PMC3727418)

**Supplemental Figure 1. Na<sup>+</sup>-K<sup>+</sup>-ATPase mRNA expression in murine small intestine in response to EPEC infection.** Real time QRT-PCR was performed in RNA extracted from control and infected mouse small intestine utilizing gene specific primers Na<sup>+</sup>-K<sup>+</sup>-ATPase (alpha subunit) and Histone as an internal control. Data are means ± SEM of values obtained from at least 4 different experiments. \**P* < 0.001 vs control.

Supplemental Figure 1

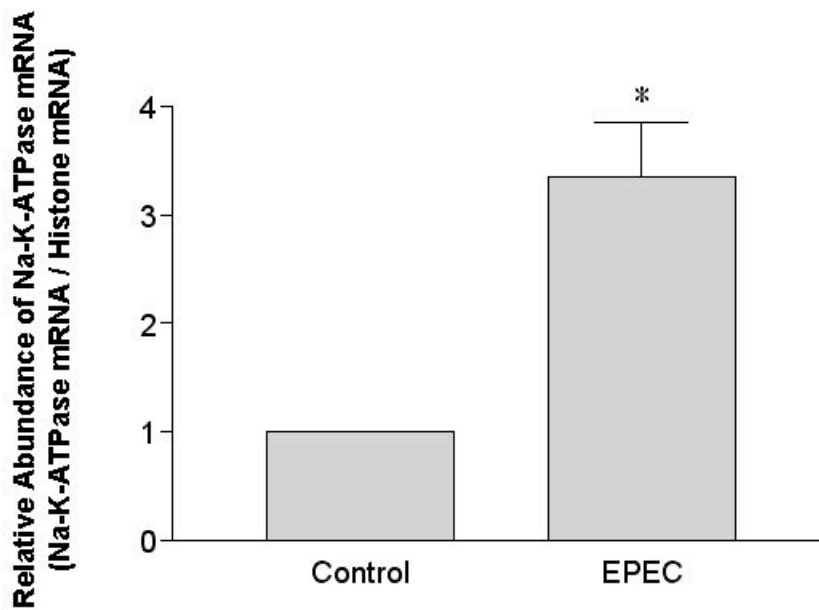

Supplement: NIHMS145181-supplement-01.pdf [file NIHMS145181-supplement-01.pdf]
