# Supplementary material
Source: PubMed Central journal article supplement (PMC3727418)
Supplement: NIHMS145181-supplement-02.pdf [file NIHMS145181-supplement-02.pdf]

**Cloning of GFP-SERT fusion constructs and Transfections:** Full-length cDNA of SERT was reverse transcribed from human small intestinal RNA (Clontech, CA) and was amplified by PCR utilizing gene specific primers:

**5' primer:** AAGGCCTCTGTGACACCATGGCCGAGACGACGCCCTTG

**3' primer:** AGAATTCGCAAGCTTCACAGCATTCAAGCGGATGTC.

The amplified fragment was subsequently cloned into pAcGFP1-N In fusion Ready vector (Clontech, CA) in frame with the GFP tagged. Caco-2 cells were transfected with SERT-GFP fusion protein utilizing Amaxa Nucleofector System (Amaxa, GmbH, Germany).

**RNA extraction and real time quantitative RT-PCR analysis:** Total RNA was extracted from control and infected Caco-2 cells after treating with gentamicin or from different regions of the mouse intestine by commercially available kit (Qiagen, CA). Equal amounts of RNA from control and infected samples were amplified in one-step reaction using Brilliant SYBR Green quantitative RT-PCR Master Mix kit (Stratagene, La Jolla, CA).
